# Supplementary material for: Renal oncocytoma characterized by the defective complex I of the respiratory chain boosts the synthesis of the ROS scavenger glutathione
Source: PubMed Central journal article supplement (PMC5739687; doi:10.18632/oncotarget.22413), 2017-11-11
Supplement: oncotarget-08-105882-s001.pdf [file oncotarget-08-105882-s001.pdf]

# Renal oncocytoma characterized by the defective complex I of the respiratory chain boosts the synthesis of the ROS scavenger glutathione

## SUPPLEMENTARY MATERIALS

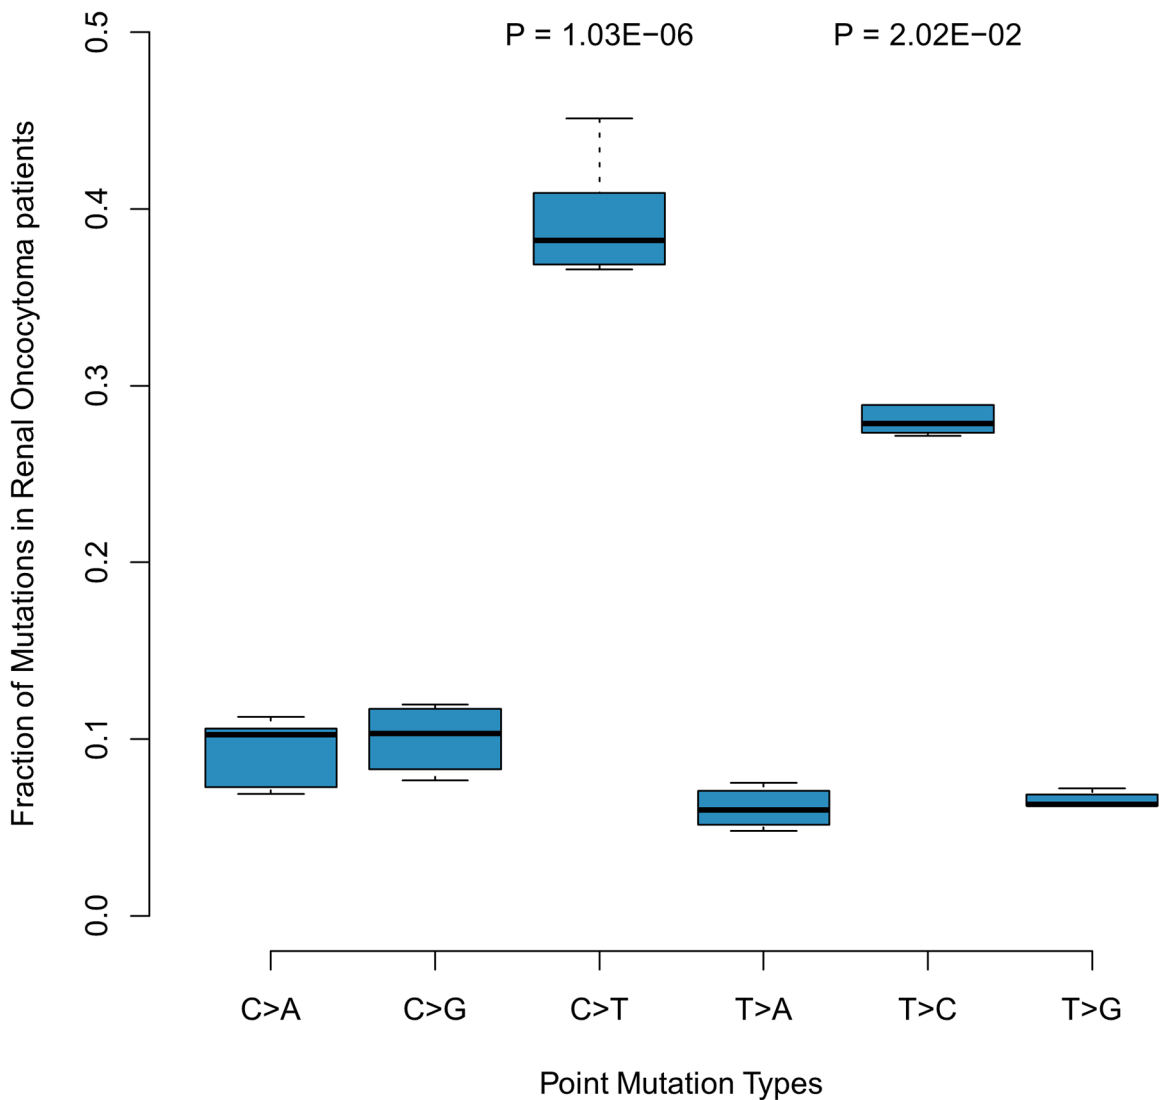

**Supplementary Figure 1: Somatic point mutation types identified in renal oncocytoma patients.** Statistical significance was derived from Wilcoxon rank-sum test.

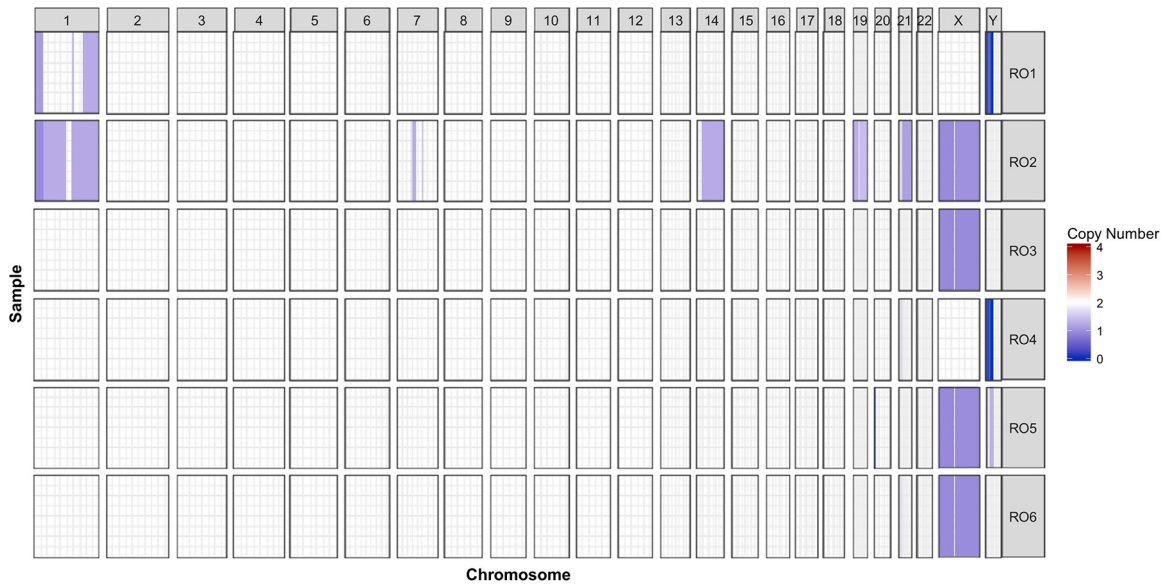

**Supplementary Figure 2: Copy number variation (CNV) analysis results from renal oncocytoma patients.** Dark blue indicates chromosomal loss, while red indicates chromosomal gain, which was not detected.

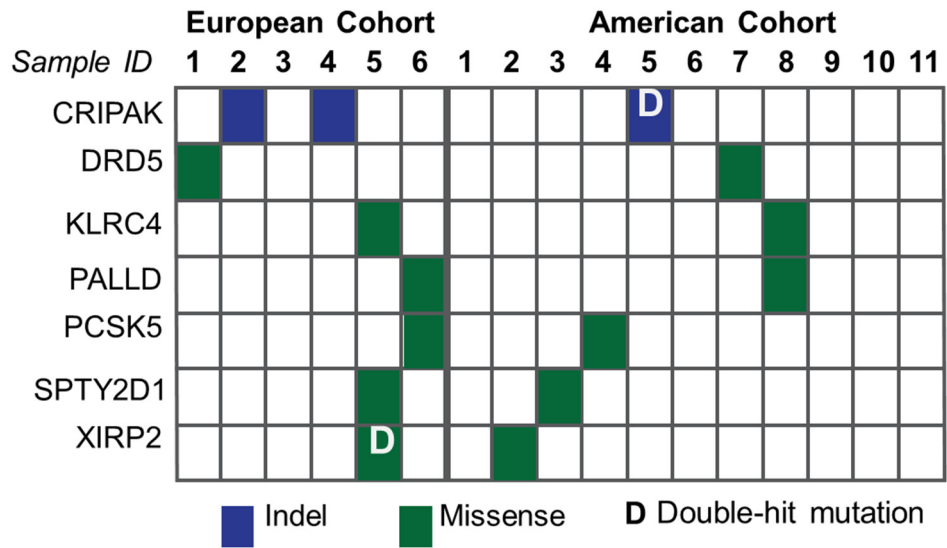

**Supplementary Figure 3: Somatic mutations in comparison to American cohort [16].** Only SNVs common between European and American cohorts are shown; the complete list of detected somatic SNVs and indels is reported in Supplementary Table 2.

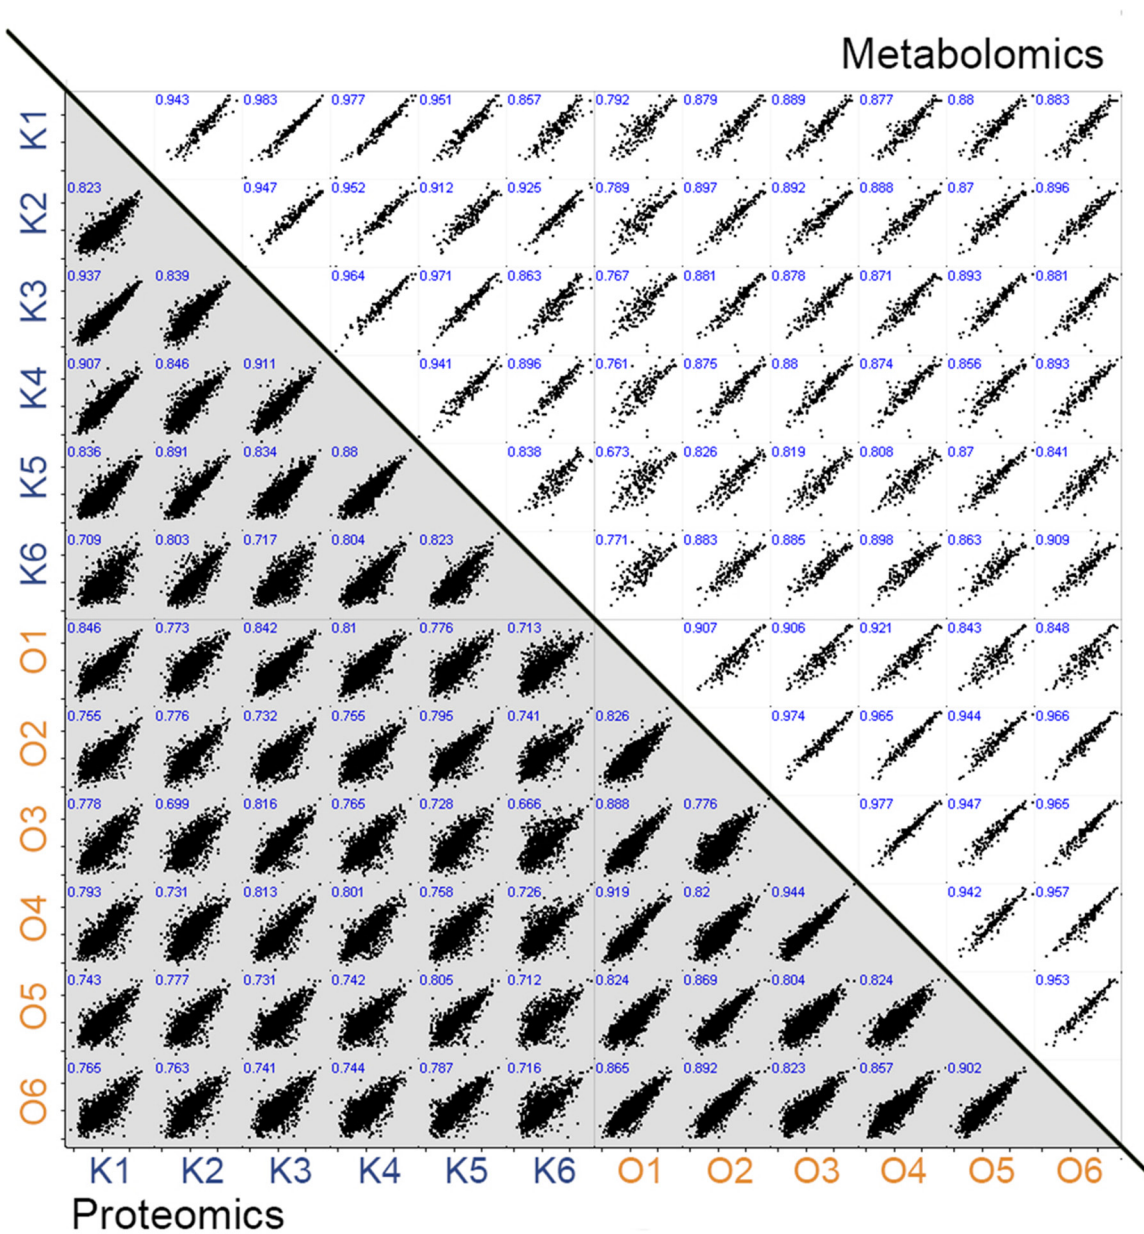

Supplementary Figure 4: Pearson correlation of the proteome and metabolome between all renal oncocytomas and kidney tissues is shown in scatter plots. K = kidney, O = oncocytoma.

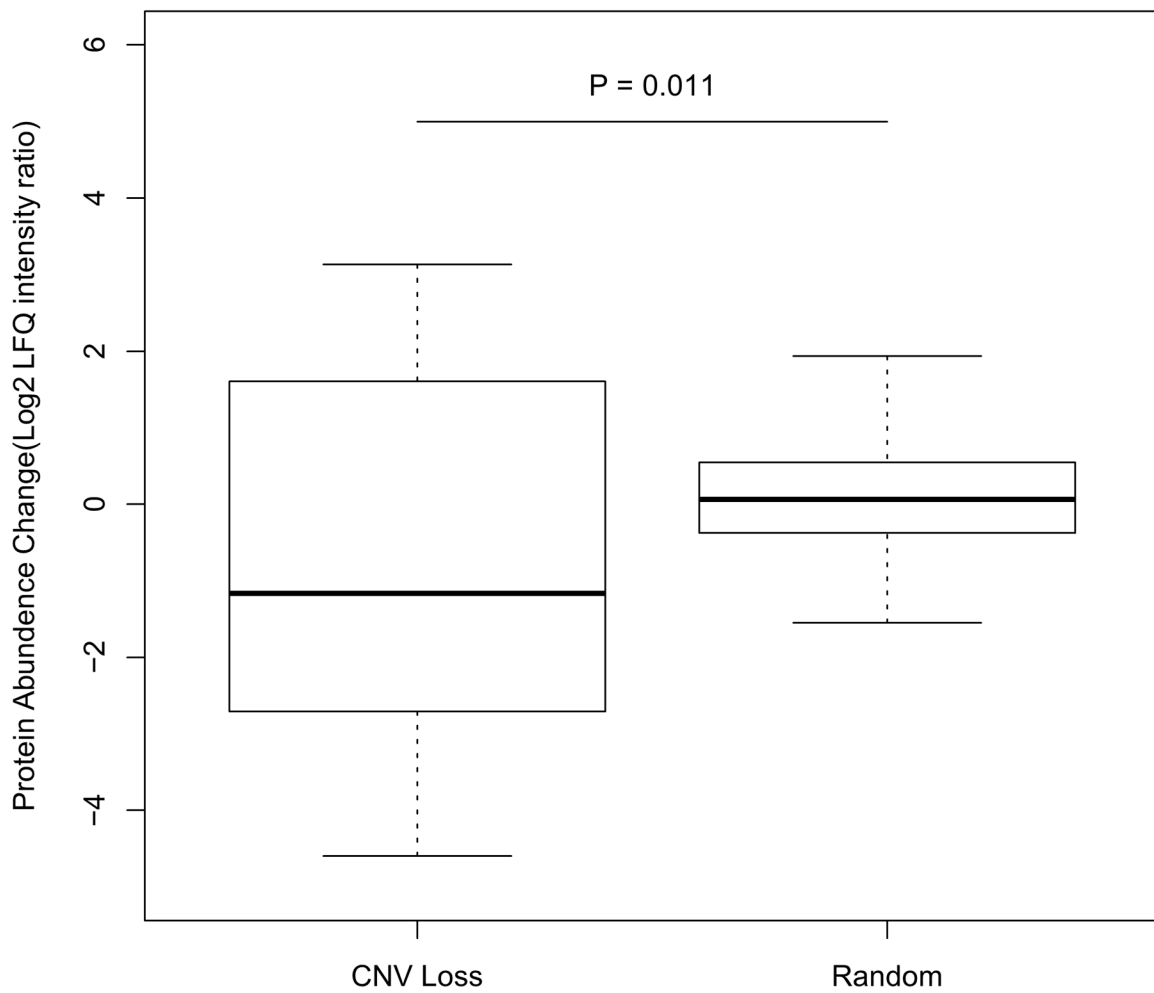

**Supplementary Figure 5: Changes of protein abundances of genes with loss of copy number in renal oncocytoma patients compared to random sets.** The random sets were generated via bootstrapping proteins were not affected by CNV. Statistical significance was derived from Wilcoxon rank-sum test.

**Supplementary Table 1: The percentage of reconstructed genome covered by the assembly, the mean coverage depth, the number of contigs obtained and the best predicted haplogroup are reported for each sample**

| Sample | mtDNA coverage | Mean read depth | Number of contigs | Best predicted haplogroup(s) |
|--------|----------------|-----------------|-------------------|------------------------------|
| O1     | 100            | 308.66          | 1                 | W3a1d                        |
| K1     | 99.99          | 252.18          | 1                 | W3a1d                        |
| O2     | 99.59          | 207.61          | 2                 | H2a1c                        |
| K2     | 99.95          | 81.68           | 1                 | H2a1c                        |
| O3     | 99.95          | 173.79          | 1                 | H5a1                         |
| K3     | 99.6           | 83.74           | 2                 | H5a1                         |
| O4     | 99.89          | 206.37          | 2                 | U5a1b                        |
| K4     | 99.81          | 114.75          | 2                 | U5a1b                        |
| O5     | 99.63          | 162.39          | 2                 | H7a1a                        |
| K5     | 99.16          | 71.98           | 4                 | H7a1a                        |
| O6     | 99.84          | 104.92          | 2                 | H5a1g                        |
| K6     | 99.99          | 123.03          | 1                 | H5a1g                        |

O = oncocytoma, K = kidney, same sample numbers are derived from the same patient.

**Supplementary Table 2: List of all detected somatic mutations in renal oncocytoma patients**

See Supplementary File 1

**Supplementary Table 3: Numbers of somatic point mutations categorized by mutation types in renal oncocytoma patients**

|            | C>A        | C>G        | C>T         | T>A        | T>C         | T>G        |
|------------|------------|------------|-------------|------------|-------------|------------|
| RO1        | 62         | 73         | 230         | 47         | 173         | 39         |
| RO2        | 77         | 68         | 261         | 44         | 187         | 47         |
| RO3        | 76         | 77         | 264         | 51         | 202         | 52         |
| RO4        | 78         | 88         | 282         | 41         | 200         | 47         |
| RO5        | 63         | 70         | 412         | 47         | 264         | 57         |
| RO6        | 44         | 50         | 247         | 29         | 202         | 32         |
| <b>Sum</b> | <b>400</b> | <b>426</b> | <b>1696</b> | <b>259</b> | <b>1228</b> | <b>274</b> |

transition transversion 



**Supplementary Table 4: Complete list of genes with Copy Number Variations**

See supplementary File 2

**Supplementary Table 5: Complete list of complexes consists of genes with somatic mutations identified in renal oncocytoma samples**

See supplementary File 3

**Supplementary Table 6: Pairwise comparison of healthy kidney tissue and renal oncocytoma mtDNA mutations obtained by applying the MToolBox package**

See supplementary File 4

**Supplementary Table 7: MaxQuant output file featuring the proteome profile of renal oncocytoma and matching kidney tissue with LFQ intensities**

See supplementary File 5

**Supplementary Table 8: List of protein groups and LFQ intensities identified in at least three samples of the kidney and oncocytoma group**

See supplementary File 6

**Supplementary Table 9: Pathway enrichment analysis (GSEA) of proteins between renal oncocytoma and kidney tissue**

See supplementary File 7

**Supplementary Table 10: List of identified metabolites (including HMDB and KEGG ID) in oncocytoma and kidney tissues as  $\log_2$  transformed peak areas**

See supplementary File 8

**Supplementary Table 11: Detection parameters for metabolite multiple reaction monitoring (MRM) methods**

See supplementary File 9
